# Supplementary material
Source: MDPI journal article supplement (https://www.mdpi.com/2071-1050/13/19/10665)
Supplement: s1 [file s1]

**Table S1.** Self-reported participants' demographics

| <b>Pseudonym</b> |  | <b>Gender</b> | <b>Age</b> | <b>Race/Ethnicity</b> | <b>Occupation</b>                          | <b>Tenure at Job (Years)</b> |
|------------------|--|---------------|------------|-----------------------|--------------------------------------------|------------------------------|
| Zeph             |  | Male          | 24         | Mixed/Hispanic        | Hardware store worker                      | 2                            |
| Mary             |  | Female        | 23         | White                 | Veterinary technician/Grocery store worker | 3                            |
| Phil             |  | Male          | 34         | Native American       | Liquor store worker                        | 6.5                          |
| Eda              |  | Female        | 23         | White                 | Medical assistant                          | 1                            |
| Milton           |  | Male          | 42         | White                 | Coffee shop owner                          | 9                            |
| Michelle         |  | Female        | 60         | White                 | Drugstore worker                           | 20                           |
| Tom              |  | Male          | 29         | White                 | Electrical sales worker                    | 2.5                          |
| Joe              |  | Male          | 40         | Biracial              | Oil/Gas industry worker                    | 12                           |
| Megan            |  | Male          | 36         | White                 | Kitchen renovations manager                | 3                            |
| Tristan          |  | Male          | 27         | White                 | Lab manager                                | 1                            |
| Stewart          |  | Male          | 39         | White                 | Bar manager                                | 11                           |
| Simon            |  | Male          | 30         | White                 | Carpenter                                  | 9                            |
| Mara             |  | Female        | 31         | White                 | Physical therapist                         | 6                            |
| Ruth             |  | Female        | 64         | White                 | Outpatient nurse                           | 4.5                          |
| Lulu             |  | Female        | 38         | Black                 | Nurse                                      | 14                           |
| Lucy             |  | Female        | 56         | White                 | Nurse                                      | 33                           |
| Enzi             |  | Male          | 43         | Black                 | Infectious disease doctor                  | 6                            |
| Dawn             |  | Female        | 55         | White                 | Nurse                                      | 30                           |
| Donte            |  | Male          | 40         | Black                 | Nurse                                      | 40                           |
